# Supplementary material for: Modeling reconstruction-related behavior and evaluation of influences of major information sources
Source: PubMed Central journal article supplement (PMC6707550; doi:10.1371/journal.pone.0221561), 2019-08-23
Supplement: pone.0221561.s001.pdf [file pone.0221561.s001.pdf]

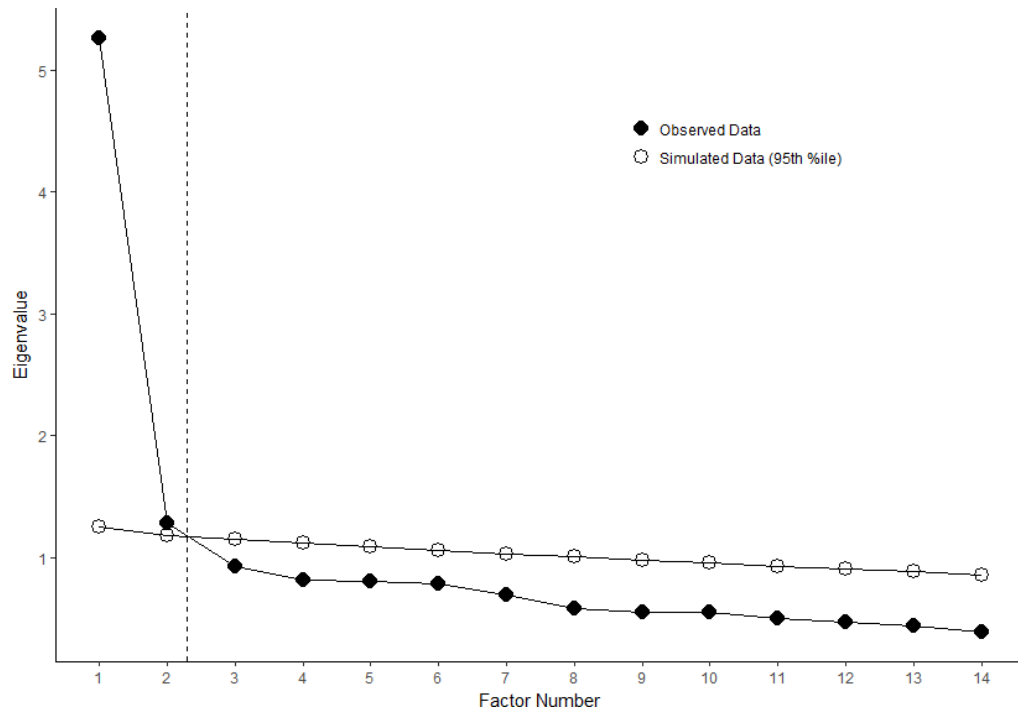

**S1 Fig. Parallel analysis and eigenvalues of factor analysis.**
