# Supplementary material for: Modeling reconstruction-related behavior and evaluation of influences of major information sources
Source: PubMed Central journal article supplement (PMC6707550; doi:10.1371/journal.pone.0221561), 2019-08-23
Supplement: pone.0221561.s004.pdf [file pone.0221561.s004.pdf]

**S2 table. Pearson's correlation coefficient between options of knowledge.**

|     | A-1  | A-2    | A-3    | A-4    | A-5    | A-6    | A-7    | B-1    | B-2    | B-3    | B-4    | B-5    | B-6    | B-7    |
|-----|------|--------|--------|--------|--------|--------|--------|--------|--------|--------|--------|--------|--------|--------|
| A-1 | 1.00 | 0.25** | 0.23** | 0.19** | 0.18** | 0.19** | 0.08** | 0.44** | 0.36** | 0.24** | 0.36** | 0.30** | 0.19** | 0.21** |
| A-2 |      | 1.00   | 0.35** | 0.35** | 0.32** | 0.28** | 0.23** | 0.33** | 0.38** | 0.36** | 0.29** | 0.31** | 0.30** | 0.30** |
| A-3 |      |        | 1.00   | 0.39** | 0.26** | 0.41** | 0.16** | 0.28** | 0.36** | 0.33** | 0.34** | 0.28** | 0.27** | 0.31** |
| A-4 |      |        |        | 1.00   | 0.36** | 0.38** | 0.28** | 0.26** | 0.33** | 0.37** | 0.34** | 0.33** | 0.31** | 0.34** |
| A-5 |      |        |        |        | 1.00   | 0.30** | 0.22** | 0.24** | 0.29** | 0.27** | 0.29** | 0.30** | 0.38** | 0.29** |
| A-6 |      |        |        |        |        | 1.00   | 0.26** | 0.27** | 0.28** | 0.29** | 0.33** | 0.28** | 0.32** | 0.39** |
| A-7 |      |        |        |        |        |        | 1.00   | 0.19** | 0.18** | 0.18** | 0.20** | 0.25** | 0.22** | 0.32** |
| B-1 |      |        |        |        |        |        |        | 1.00   | 0.54** | 0.51** | 0.46** | 0.44** | 0.33** | 0.33** |
| B-2 |      |        |        |        |        |        |        |        | 1.00   | 0.52** | 0.55** | 0.46** | 0.36** | 0.36** |
| B-3 |      |        |        |        |        |        |        |        |        | 1.00   | 0.52** | 0.49** | 0.36** | 0.37** |
| B-4 |      |        |        |        |        |        |        |        |        |        | 1.00   | 0.52** | 0.34** | 0.39** |
| B-5 |      |        |        |        |        |        |        |        |        |        |        | 1.00   | 0.36** | 0.37** |
| B-6 |      |        |        |        |        |        |        |        |        |        |        |        | 1.00   | 0.48** |
| B-7 |      |        |        |        |        |        |        |        |        |        |        |        |        | 1.00   |

\*\*p<.01
