# Supplementary material for: Modeling reconstruction-related behavior and evaluation of influences of major information sources
Source: PubMed Central journal article supplement (PMC6707550; doi:10.1371/journal.pone.0221561), 2019-08-23
Supplement: pone.0221561.s005.pdf [file pone.0221561.s005.pdf]

**S3 table. Arithmetic mean and standard deviation of observed variables (Total).**

|                                                      |                          | Arithmetic Mean | Standard Deviation |
|------------------------------------------------------|--------------------------|-----------------|--------------------|
| Intention concerning Reconstruction-related Behavior | Respondents/ foods       | 1.89            | 0.63               |
|                                                      | Family members/ foods    | 1.77            | 0.65               |
|                                                      | Respondents/ travel      | 1.88            | 0.65               |
|                                                      | Family members/ travel   | 1.76            | 0.66               |
| Radiation Risk Perception                            | delayed risk             | 2.55            | 0.91               |
|                                                      | genetic risk             | 2.48            | 0.90               |
| Knowledge                                            | Physical knowledge       | 0.00            | 0.93               |
|                                                      | Health/ Social knowledge | 0.00            | 0.90               |
