# Supplementary material for: Modeling reconstruction-related behavior and evaluation of influences of major information sources
Source: PubMed Central journal article supplement (PMC6707550; doi:10.1371/journal.pone.0221561), 2019-08-23
Supplement: pone.0221561.s007.pdf [file pone.0221561.s007.pdf]

**S5 table. Arithmetic mean and standard deviation of observed variables (P group).**

|                                                      |                          | Arithmetic Mean | Standard Deviation |
|------------------------------------------------------|--------------------------|-----------------|--------------------|
| Intention concerning Reconstruction-related Behavior | Respondents/ foods       | 2.01            | 0.66               |
|                                                      | Family members/ foods    | 1.90            | 0.70               |
|                                                      | Respondents/ travel      | 2.02            | 0.68               |
|                                                      | Family members/ travel   | 1.91            | 0.72               |
| Radiation Risk Perception                            | delayed risk             | 2.24            | 0.90               |
|                                                      | genetic risk             | 2.14            | 0.88               |
| Knowledge                                            | Physical knowledge       | 0.09            | 0.97               |
|                                                      | Health/ Social knowledge | 0.09            | 0.98               |
