# Supplementary material for: Modeling reconstruction-related behavior and evaluation of influences of major information sources
Source: PubMed Central journal article supplement (PMC6707550; doi:10.1371/journal.pone.0221561), 2019-08-23
Supplement: pone.0221561.s009.pdf [file pone.0221561.s009.pdf]

**S7 table. Arithmetic mean and standard deviation of observed variables (NP group).**

|                                                      |                          | Arithmetic Mean | Standard Deviation |
|------------------------------------------------------|--------------------------|-----------------|--------------------|
| Intention concerning Reconstruction-related Behavior | Respondents/ foods       | 1.85            | 0.62               |
|                                                      | Family members/ foods    | 1.73            | 0.62               |
|                                                      | Respondents/ travel      | 1.84            | 0.64               |
|                                                      | Family members/ travel   | 1.72            | 0.64               |
| Radiation Risk Perception                            | delayed risk             | 2.64            | 0.89               |
|                                                      | genetic risk             | 2.58            | 0.88               |
| Knowledge                                            | Physical knowledge       | -0.03           | 0.91               |
|                                                      | Health/ Social knowledge | -0.03           | 0.88               |
