# Supplementary material for: Modeling reconstruction-related behavior and evaluation of influences of major information sources
Source: PubMed Central journal article supplement (PMC6707550; doi:10.1371/journal.pone.0221561), 2019-08-23
Supplement: pone.0221561.s010.pdf [file pone.0221561.s010.pdf]

**S8 table. Pearson's correlation coefficient between observed variables (NP group).**

|                                                            |                          | Intention concerning Reconstruction-related Behavior |                             |                        |                              | Radiation Risk Perception |              | Knowledge             |                                |
|------------------------------------------------------------|--------------------------|------------------------------------------------------|-----------------------------|------------------------|------------------------------|---------------------------|--------------|-----------------------|--------------------------------|
|                                                            |                          | Respondents/<br>foods                                | Family<br>members/<br>foods | Respondents/<br>travel | Family<br>members/<br>travel | delayed risk              | genetic risk | Physical<br>knowledge | Health/<br>Social<br>knowledge |
| Intention concerning<br>Reconstruction-related<br>Behavior | Respondents/ foods       | 1.00                                                 | 0.73**                      | 0.73**                 | 0.60**                       | -0.26**                   | -0.26**      | 0.11**                | 0.17**                         |
|                                                            | Family members/ foods    |                                                      | 1.00                        | 0.58**                 | 0.73**                       | -0.27**                   | -0.28**      | 0.02                  | 0.08*                          |
|                                                            | Respondents/ travel      |                                                      |                             | 1.00                   | 0.75**                       | -0.24**                   | -0.27**      | 0.14**                | 0.16**                         |
|                                                            | Family members/ travel   |                                                      |                             |                        | 1.00                         | -0.27**                   | -0.30**      | 0.04                  | 0.09*                          |
| Radiation Risk Perception                                  | delayed risk             |                                                      |                             |                        |                              | 1.00                      | 0.88**       | 0.12**                | 0.08*                          |
|                                                            | genetic risk             |                                                      |                             |                        |                              |                           | 1.00         | 0.05                  | 0.03                           |
| Knowledge                                                  | Physical knowledge       |                                                      |                             |                        |                              |                           |              | 1.00                  | 0.83**                         |
|                                                            | Health/ Social knowledge |                                                      |                             |                        |                              |                           |              |                       | 1.00                           |

\*\*p<.01, \*p<.05
