# Supplementary material for: Modeling reconstruction-related behavior and evaluation of influences of major information sources
Source: PubMed Central journal article supplement (PMC6707550; doi:10.1371/journal.pone.0221561), 2019-08-23
Supplement: pone.0221561.s011.pdf [file pone.0221561.s011.pdf]

**S9 table. Multiple regression analysis regarding "health/social knowledge".**

|                    | Standardized<br>$\beta$ | p-value | VIF  |
|--------------------|-------------------------|---------|------|
| Physical knowledge | 0.795                   | 0.00    | 1.31 |
| Cluster 1          | -0.001                  | 0.98    | 1.28 |
| Cluster 3          | 0.089                   | 0.00    | 1.27 |
| Cluster 4          | -0.001                  | 0.95    | 1.45 |
| Cluster 5          | -0.011                  | 0.61    | 1.33 |
| Cluster 6          | 0.014                   | 0.46    | 1.13 |
| Cluster 7          | 0.042                   | 0.03    | 1.17 |
| Adj-R2             | 0.68                    |         |      |
